# Supplementary material for: Sediment Phosphorus Release in Boreal Lakes: The Role of Trophic State and Humic Substances
Source: Research Square preprint supplement (doi:10.21203/rs.3.rs-529887/v1), 2021-06-01
Supplement: Supplementary file 1 [file 94d0fdbc834da13d266bdaff.docx]

Supplementary Materials for

**Sediment phosphorus release in boreal lakes: the role of trophic state and humic substances**

Olga Tammeorga,b*, Gertrud Nürnbergc, Peeter Nõgesb, Juha Niemistöa

aEcosystems and Environment Research Programme, Faculty of Biological and Environmental Sciences, P.O. Box 65 (Viikinkaari 1), FI-00014 Helsinki, Finland

bChair of Hydrobiology and Fishery, Estonian University of Life Sciences, Kreutzwaldi 5, 51006 Tartu, Estonia

cFreshwater Research, 3421 Hwy 117, Baysville, Ontario, Canada, P0B 1A0

*Corresponding author e-mail address: olga.tammeorg@helsinki.fi; +37255620835

**SM Table 1** Key water quality (soluble reactive phosphorus, total phosphorus, dissolved iron) and environmental variables (water temperature, dissolved oxygen concentration, pH) on sampling in August 2018

| **Lake** | **Site** | **Depth, m** | **Temp, °C** | **DO,**  **mg/l** | **pH** | **SRP,**  **μg/l** | **TP,**  **μg/l** | **Fe,**  **μg/l** |
| --- | --- | --- | --- | --- | --- | --- | --- | --- |
| **Matjärvi** | IF | 0.0 | 17.88 | 9.47 | 7.85 | 32 | 160 | 230 |
|  | IF | 1.5 | 17.43 | 7.7 | 7.38 | 32 | 160 | 230 |
|  | CE | 0.0 | 17.82 | 10.07 | 8.34 | 30 | 150 | 250 |
|  | CE | 1.7 | 17.63 | 9.01 | 7.92 | 33 | 150 | 240 |
|  | OF | 0.0 | 17.85 | 10.41 | 8.65 | 32 | 140 | 210 |
|  | OF | 1.4 | 17.65 | 9.48 | 8.12 | 33 | 140 | 230 |
| **Kutajärvi** | IF | 0.0 | 17.12 | 10.71 | 8.24 | 17 | 60 | 86 |
|  | IF | 0.7 | 16.94 | 10.72 | 8.25 | 17 | 56 | 77 |
|  | CE | 0.0 | 17.54 | 10.79 | 8.48 | 17 | 56 | 80 |
|  | CE | 0.5 | 16.68 | 10.86 | 8.31 | 16 | 56 | 76 |
|  | OF | 0.0 | 16.26 | 10.59 | 8.13 | 16 | 54 | 86 |
|  | OF | 0.4 | 16.10 | 10.64 | 8.16 | 17 | 58 | 89 |
| **Enonselkä** | ST33 | 0.0 | 17.65 | 9.02 | 7.54 | 6 | 35 | Na |
|  | ST33 | 13.5 | 15.90 | 0.26 | 6.54 | 7 | 38 | Na |
|  | ST9 | 0.0 | 17.63 | 8.93 | 7.46 | 7 | 39 | Na |
|  | ST9 | 7.5 | 17.29 | 8.16 | 7.29 | 7 | 39 | Na |
|  | ST11 | 0.0 | 17.45 | 8.71 | 7.54 | 8 | 39 | Na |
|  | ST11 | 6.3 | 17.23 | 7.97 | 7.39 | 7 | 43 | Na |
| **Kymijärvi** | IF | 0.0 | 18.55 | 10.08 | 8.07 | 9 | 33 | Na |
|  | IF | 8.3 | 8.67 | 0.14 | 6.39 | 7 | 26 | Na |
|  | CE | 0.0 | 19.00 | 9.60 | 7.67 | 9 | 32 | Na |
|  | CE | 2.2 | 17.81 | 8.06 | 7.29 | 8 | 41 | Na |
|  | OF | 0.0 | 18.62 | 10.31 | 7.88 | 7 | 30 | Na |
|  | OF | 8.9 | 16.76 | 0.28 | 4.90 | 11 | 51 | Na |

Na – not available

**SM Table 2** Literature data for the lakes worldwide. Humic lakes are defined so by their geographical location (source: ”Finnish”,” Dillon”, ”Nürnberg”). Methods for release rate determination are indicated by 1 (hypolimnetic TP accumulation, in situ TP increases; RR_in situ), 2 (anaerobic core incubations), 3 (diffusion), 4 (mass balance), 5 (others).

**SM Table 3**  Release rate (RR) as a function of water quality variables (TP, DOC concentration) and/ or sediment variables (sediment TP concentration TPsed, LOI) of literature data for the lakes worldwide. Also, relationships between TP and DOC, and LOI and DOC are shown for the dataset. Some of the relationships are studied separately for oligotrophic (Oligo), mesotrophic (Meso), eutrophic (Eutr) and Hypertrophic (Hyper) lakes. Only significant effects are shown, different levels of significance are indicated with asterix (* <0.05; **<0.01; ***<0.001). Analyses are presented for three separate datasets: all data (group A), potentially humic lakes (group B), and lakes with consistently determined RR (i.e., calculated from hypolimnetic TP accumulation or core incubations; group C). The RR values were log-transformed, log(RR+1). Effect (E) indicates either positive (+) or negative effect (-).

| Factors | *Group A* | | | | *Group B* | | | | *Group C* | | | |
| --- | --- | --- | --- | --- | --- | --- | --- | --- | --- | --- | --- | --- |
|  | *All lakes* | | | | *Humic lakes* | | | | *Lakes with consistently determined RR* | | | |
|  | **E** | ***R2*** | ***p*** | ***n*** | **E** | ***R2*** | ***p*** | ***n*** | **E** | ***R2*** | ***p*** | ***n*** |
| **RR ~ log(TP) + log(DOC)** |  | 0.178 | *** |  |  | 0.249 | ** |  |  | 0.218 | *** |  |
| Log(TP) | + |  | *** |  | + |  | * |  | + |  | *** |  |
| Log(DOC) |  |  | ns |  | - |  | * |  |  |  | ns |  |
|  |  |  |  |  |  |  |  |  |  |  |  |  |
| **RR ~ log(DOC)** |  |  |  |  |  |  |  |  |  |  |  |  |
| Oligo: DOC | + | 0.306 | * | 15 | + | 0.790 | * | 5 |  |  | ns |  |
| Meso: log(DOC) | - | 0.214 | * | 20 | - | 0.360 | * | 9 | - | 0.248 | * | 21 |
| Eutr: log(DOC) |  |  | ns |  | - | 0.255 | * | 12 |  |  | ns |  |
| Hyper: log(DOC) |  |  | ns |  |  | na |  |  |  |  | ns |  |
|  |  |  |  |  |  |  |  |  |  |  |  |  |
| **RR ~ log(TP) + log(TPsed) + LOI** |  | 0.292 | ** | 45 |  | 0.554 | *** | 24 |  | 0.322 | ** | 31 |
| Log(TP) | + |  | ** |  | + |  | ** |  |  |  |  |  |
| Log(TPsed) | + |  | * |  | + |  | ** |  |  |  |  |  |
| LOI |  |  | ns |  | - |  | * |  | - |  | * |  |
|  |  |  |  |  |  |  |  |  |  |  |  |  |
| **RR ~ log(TPsed) + LOI** |  | 0.141 | * | 48 |  | 0.522 | *** | 25 |  | 0.310 | ** | 32 |
| Log(TPsed) |  |  | ns |  | + |  | ** |  |  |  | ns |  |
| LOI | - |  | * |  | - |  | *** |  | - |  | ** |  |
|  |  |  |  |  |  |  |  |  |  |  |  |  |
| **RR ~ log(TPsed)** |  |  | ns | 52 |  | 0.230 | * | 26 |  |  | ns | 36 |
|  |  |  |  |  |  |  |  |  |  |  |  |  |
| **RR ~ log(TP) + log(TPsed)** |  | 0.246 | ** |  |  | 0.424 | ** | 25 |  | 0.198 | * | 34 |
| Log(TP) | + |  | ** |  | + |  | * |  | + |  | * |  |
| Log(TPsed) | + |  | * |  | + |  | ** |  |  |  | ns |  |
| Oligo: log(TPsed) |  |  |  |  |  |  |  |  |  |  | ns |  |
| Meso: log(TPsed) |  |  |  |  |  |  |  |  |  |  | ns |  |
| Eutr: log(TPsed) |  |  |  |  | + | 0.619 | ** |  |  |  | ns |  |
| Hyper: log(TPsed) | + | 0.389 | ** | 16 |  |  | na |  |  |  | ns |  |
|  |  |  |  |  |  |  |  |  |  |  |  |  |
| **RR ~ LOI** | - | 0.091 | * | 53 |  | 0.397 | *** | 28 |  | 0.259 | *** | 37 |
|  |  |  |  |  |  |  |  |  |  |  |  |  |
| **RR ~ log(TP) + LOI** |  |  |  |  |  | 0.418 | *** |  |  | 0.265 | ** |  |
| Log(TP) | + |  | ** |  | + |  | ** |  | + |  | * |  |
| LOI |  |  | ns |  | - |  | ** |  | - |  | * |  |
|  |  |  |  |  |  |  |  |  |  |  |  |  |
| **RR ~ LOI** |  |  | ns |  |  |  | ns |  |  |  | ns |  |
| Oligo: |  |  | ns |  |  |  | ns |  |  |  | ns |  |
| Meso: |  |  | ns |  |  |  | ns |  |  |  | ns |  |
| Eutr: |  |  | ns |  |  |  | ns |  |  | 0.231 | * |  |
| Hyper: |  |  | ns |  |  |  | na |  |  |  | ns |  |
|  |  |  |  |  |  |  |  |  |  |  |  |  |
| **Log(TP) ~ log(DOC)** | + | 0.258 | *** | 93 | + | 0.384 | *** | 40 | + | 0.260 | *** | 72 |
|  |  |  |  |  |  |  |  |  |  |  |  |  |
| **LOI ~ log(DOC)** |  |  |  | 51 | - | 0.315 | ** | 28 | - | 0.160 | * | 37 |
|  |  |  |  |  |  |  |  |  |  |  |  |  |

**Supplementary references**

Amirbahman A, Lake BA, Norton SA (2013) Seasonal phosphorus dynamics in the surficial sediment of two shallow temperate lakes: a solid-phase and pore-water study. Hydrobiol 701:65-77

Amirbahman A, Pearce AR, Bouchard RJ et al (2003) Relationship between hypolimnetic phosphorus and iron release from eleven lakes in Maine, USA. Biogeochem 65:369-386

Bade DL, Carpenter SR, Cole JJ et al (2007) Sources and fates of dissolved organic carbon in lakes as determined by whole-lake carbon isotope additions. Biogeochem 84: 115-129

Boers PCM, Van Hese O (1988) Phosphorus release from the peaty sediments of the Loosdrecht Lakes (The Netherlands). Water Res 22:355-363

Burley KL, Prepas EE, Chambers PA (2001) Phosphorus release from sediments in hardwater eutrophic lakes: the effects of redox‐sensitive and‐insensitive chemical treatments. Freshw Biol 46:1061-1074

Christophoridis C, Fytianos K (2006) Conditions affecting the release of phosphorus from surface lake sediments. J Environ Qual 35:1181-1192

Clark JB, Mannino A (2021) Preferential loss of Yukon River delta colored dissolved organic matter under nutrient replete conditions. Limnol Oceanogr

De Haan H, De Boer T, Voerman J (1991) Size distribution of dissolved (< 200 nm) organic carbon and aluminium in alkaline and humic lakes. Hydrobiol Bulletin 24:145-151

de Vicente I, Jensen HS, Andersen FØ (2008) Factors affecting phosphate adsorption to aluminum in lake water: implications for lake restoration. Sci Total Environ 389: 29-36

Dillon PJ., Molot LA (1996) Long-term phosphorus budgets and an examination of a steady-state mass balance model for central Ontario lakes. Wat Res 30: 2273-2280

Doan PT, Watson SB, Markovic S et al (2018) Phosphorus retention and internal loading in the Bay of Quinte, Lake Ontario, using diagenetic modelling. Sci Total Environ 636:39-51

Doolittle HA, Norton SA, Bacon LC, Ewing HA, Amirbahman A (2018) The internal and watershed controls on hypolimnetic sediment phosphorus release in Lake Auburn, Maine, USA. Lake Reservoir Manage 34:258–269

Egemose S, de Vicente I, Reitzel K et al (2011) Changed cycling of P, N, Si, and DOC in Danish Lake Nordborg after aluminum treatment. Can J Fish Aquat Sci 68:842-856

Ekvall MK, de la Calle Martin J, Faassen EJ et al (2013) Synergistic and species‐specific effects of climate change and water colour on cyanobacterial toxicity and bloom formation. Freshw Biol 58: 2414-2422.

Fricker Hj (1980) Alpine lakes. Sl-'Ïss Federal Board for Environmental Protection.

Hongve D (1997) Cycling of iron, manganese, and phosphate in a meromictic lake. Limnol Oceanogr 42: 635-647

Istvanovics V (1988) Seasonal variation of phosphorus release from the sediments of shallow Lake Balaton (Hungary). Wat Res 22:1473-1481.

James WF (2017) Internal phosphorus loading contributions from deposited and resuspended sediment to the Lake of the Woods. Lake Reservoir Manage 33:347-359

Jensen HS, Andersen FO (1992) Importance of temperature, nitrate, and pH for phosphate release from aerobic sediments of four shallow, eutrophic lakes. Limnol Oceanogr 37: 577-589

Li J, Zhang Y, Katsev S (2018) Phosphorus recycling in deeply oxygenated sediments in Lake Superior controlled by organic matter mineralization. Limnol Oceanogr 63:1372-1385

Matisoff G, Watson SB, Guo J et al (2017) Sediment and nutrient distribution and resuspension in Lake Winnipeg. Sci Total Environ 575:173-186

Meyer-Jacob C, Michelutti N, Paterson AM et al (2019) The browning and re-browning of lakes: divergent lake-water organic carbon trends linked to acid deposition and climate change. Sci Reports 9:1-10.

Mitchell P, Prepas E (1990) Atlas of Alberta lakes. Edmonton, AB: The University of Alberta Press.

Nürnberg G (1997) Coping with water quality problems due to hypolimnetic anoxia in Central Ontario Lakes. Wat Qual Res J 32:391-405

Nürnberg GK (1984) The prediction of internal phosphorus load in lakes with anoxic hypolimnia 1. Limnol Oceanogr 29:111-124

Nürnberg GK (1988) Prediction of phosphorus release rates from total and reductant-soluble phosphorus in anoxic lake sediments. Can J Fish Aquat Sci 45:453-462

Nürnberg GK (1995) Quantifying anoxia in lakes. Limnol Oceanogr 40:1100-1111

Nürnberg GK (1996) Trophic state of clear and colored, soft-and hardwater lakes with special consideration of nutrients, anoxia, phytoplankton and fish. Lake Reservoir Manage 12: 432-447.

Paytan A, Roberts K, Watson S et al (2017) Internal loading of phosphate in lake erie central basin. Sci Total Environ 579:1356-1365

Pilla RM, Couture RM (2021) Attenuation of photosynthetically active radiation and ultraviolet radiation in response to changing dissolved organic carbon in browning lakes: Modeling and parametrization. Limnol Oceanogr

Preston DL, Caine N, McKnight DM et al (2016) Climate regulates alpine lake ice cover phenology and aquatic ecosystem structure. Geophys Res Letters 43: 5353-5360

Reitzel K, Balslev KA, Jensen HS (2017) The influence of lake water alkalinity and humic substances on particle dispersion and lanthanum desorption from a lanthanum modified bentonite. Wat Research 125:191-200

Riley ET, Prepas EE (1984) Role of internal phosphorus loading in two shallow, productive lakes in Alberta, Canada. Can J Fish Aquat Sci 41: 845-855

Schauser I, Chorus I, Lewandowski J (2006) Effects of nitrate on phosphorus release: comparison of two Berlin lakes. Acta Hydrochim Hydrobiol 34: 325-332

Schindler DW, Curtis PJ, Bayley SE et al (1997) Climate-induced changes in the dissolved organic carbon budgets of boreal lakes. Biogeochem 36:9-28

Selig U (2003) Characterisation and quantification of phosphorus release from profundal bottom sediments in two dimictic lakes during summer stratification. J Limnol 62:151-162

Steinman A, Rediske R, Reddy KR (2004) The reduction of internal phosphorus loading using alum in Spring Lake, Michigan. J Environ Qual 33:2040-2048

Søndergaard M, Kristensen P, Jeppesen E (1992) Phosphorus release from resuspended sediment in the shallow and wind-exposed Lake Arresø, Denmark. Hydrobiol 228: 91-99

Williamson CE, Overholt EP, Brentrup JA et al (2016) Sentinel responses to droughts, wildfires, and floods: effects of UV radiation on lakes and their ecosystem services. Frontiers Ecol Environ 14:102-109.
